- advancing age on the sympathetic response to laryngoscopy and tracheal intubation. *Anesth Analg* 68:603-608, 1989
4. Langley MS, Heel RC: Propofol: A review of its pharmacodynamic and pharmacokinetic properties and use as an intravenous anesthetic. *Drugs* 35:334-372, 1988
  5. Sebel PS, Lowdon JD: Propofol: A new intravenous anesthetic. *ANESTHESIOLOGY* 71:260-277, 1989
  6. Kelly JS, Roy RC: Intraoperative awareness with propofol-oxygen total intravenous anesthesia for microlaryngeal surgery. *ANESTHESIOLOGY* 77:207-209, 1992
  7. Helfman SM, Gold MI, DeLisser EA, Herrington CA: Which drug prevents tachycardia and hypertension associated with tracheal intubation: Lidocaine, fentanyl, or esmolol? *Anesth Analg* 72:482-486, 1991
  8. Cucchiara RF, Benefiel DJ, Matteo RS, DeWood M, Albin MS: Evaluation of esmolol in controlling increases in heart rate and blood pressure during endotracheal intubation in patients undergoing carotid endarterectomy. *ANESTHESIOLOGY* 65:528-531, 1986
  9. Leslie JB, Kalayjian RW, McLoughlin TM, Plachetka JR: Attenuation of the hemodynamic responses to endotracheal intubation with preinduction intravenous labetalol. *J Clin Anesth* 1:194-200, 1989
  10. Shafer A, Doze VA, Shafer SL, White PF: Pharmacokinetics and pharmacodynamics of propofol infusions during general anesthesia. *ANESTHESIOLOGY* 69:348-356, 1988
  11. Vuyk J, Engbers FHM, Lemmens HJM, Burm AGL, Vletter AA, Gladines MPRR, Bovill JG: Pharmacodynamics of propofol in female patients. *ANESTHESIOLOGY* 77:3-9, 1992
  12. Leslie K, Crankshaw DP: Potency of propofol for loss of consciousness after a single dose. *Br J Anaesth* 64:734-736, 1990
  13. Jessop J, Griffiths DE, Furness P, Jones JG, Sapsford DJ, Breckon DA: Changes in amplitude and latency of the P300 component of the auditory evoked potential with sedative and anaesthetic concentrations of nitrous oxide. *Br J Anaesth* 67:524-531, 1991

(Accepted for publication September 3, 1992.)

Anesthesiology  
77:1234, 1992

### Hespan® and Air Embolism

*To the Editor:*—Hespan® (6% hetastarch, DuPont, Wilmington, DE) was supplied for many years in 500-mL bags with no air in the bag. It is now supplied in bags containing approximately 60 mL of air. Because Hespan® is commonly administered with the aid of a pressure infusion device, I draw the reader's attention to the need to prevent venous air embolism when using Hespan®.

FRANK ROBBINS, M.D.

*Department of Anesthesiology  
The Jewish Hospital of St. Louis at Washington University  
216 South Kingshighway  
St. Louis, Missouri 63110*

(Accepted for publication September 12, 1992.)

Anesthesiology  
77:1234, 1992

*In Reply:*—Recently, Du Pont Pharma and McGaw introduced Hespan® (6% hetastarch in 0.9% sodium chloride injection) in a new Excel® container. The previous bag did not contain significant amounts of air, whereas the new bag does. This does not affect the quality of the product, but the air may affect how it is administered. As with all infusion products, care should be taken not to introduce air into the infusion tubing when using the product. If administration is controlled by a pumping device, care must be taken to discontinue pumping action before the container runs dry, or air embolism may result. If the product is administered by pressure infusion, all air should be withdrawn or expelled from the bag through the medication port before infusion.

The package insert for Hespan® states, "If administration is by pressure infusion, all air should be withdrawn or expelled from the bag through the medication port prior to infusion."

JOHN N. HURLEY, M.D.

*Medical Director, Medical Affairs  
The DuPont Merck Pharmaceutical Company  
P. O. Box 80025  
Wilmington, Delaware 19880-0025*

(Accepted for publication September 12, 1992.)
